# Supplementary material for: Validation of in vitro and in vivo personalized cancer treatment assays for head and neck squamous cell carcinoma
Source: Research Square preprint supplement (doi:10.21203/rs.3.rs-2357747/v1), 2022-12-12
Supplement: Supplementary file 1 [file fe1bc67cd5ed5623e9b245b3.docx]

## **Supplementary table 1: Patients’ details:** Clinical and pathological features of the three patients.

| **Patient and cell line code** | **Surgery date**  **(D/M/YY)** | **Gender** | **Age** | **Tumor location**  **and size** | **Stage** | **Grade** | **Other documented diagnosis in tumor area** | **Treatments after surgery** | **Other diseases** | **Lifestyle** | **Metastases** |
| --- | --- | --- | --- | --- | --- | --- | --- | --- | --- | --- | --- |
| Patient 1  UH-SCC-17A  &  UH-SCC-17B | 11/11/2020 | Male | 51 | Mobile tongue cancer, carcinoma epidermoid linguae (left lateral border of the tongue: 43 mm) | T3N2bM0 | 3 | On the left lateral border of the tongue  1993: *Leukoplakia* recorded  2000: *Dysplasia levis*  2004: *Lichenoid reaction* and *dysplasia levis* | Cisplatin chemo-radiotherapy ended 2/2021. Pembrolizumab from 27/5/2021 discontinued 17/6/2021. Carboplatin-cetuximab-5-FU from 27/7/2021.  Cetuximab from 8/12/2021. | Skin psoriasis | No tobacco.  1-3 alcohol doses/week | Control PET-CT new lung metastasis Lymph Nodes3/33  L2a 1/2; L3 2/15  17 mm largest diameter. |
| Patient 2  UH-SCC-18A  &  UH-SCC-18B | 24/11/2020 | Male | 52 | Mobile tongue cancer, carcinoma epidermoid linguae (lateral border of the tongue: 30 mm) | T3N3bM0 | 2 | No | Cisplatin-treatment began 5/1/2021, stopped after third dose 19/1/2021. Paclitaxel began 26/1/2021, stopped due to allergic reaction. Postoperative radiotherapy ended 12/2/2021 | [Musculo-skeletal disorders](https://www.google.com/search?bih=829&biw=1745&rlz=1C1GCEB_en&hl=en&sxsrf=ALiCzsYo6iqP9VzYzRacn9kuvjGGYMsSOw:1662454150017&q=Musculoskeletal+disorders&sa=X&ved=2ahUKEwjHssSo5P_5AhXVi8MKHcfhAzsQ7xYoAHoECAEQNg)  abnormal anatomy and postural limitations (Persistent), tobacco addiction (Persistent), intervertebral disc disease and nervous system disorders | 5 cigarettes /day for 30 years.  Alcohol 6-10 doses/week | Neck colonies, metastasis in upper jugular chain and border of the fifth zone. Lymph Nodes 6/76. Right (46): L1B 3, L2B1 Left (28): L1B 1 Left: 40 mm largest. Right: 50 mm largest diameter. |
| Patient 3  UH-SCC-23B | 30/8/2021 | Female | 69 | Squamous cell carcinoma of the right buccal mucosa: 50 mm | T3N1M0 | 3 | 2 years previously a lesion on the right buccal mucosa | Postoperative radiotherapy ended 13/12/2021. | Diabetes Mellitus Type 2, asthma, sleep apnea, high blood pressure, osteoarthritis, atrophic gastritis, hyper-choleteraemia, pancreatitis, vitiligo | No tobacco  No alcohol | Lymph node metastases 1/38. Right: 1/38, L2A; 13 mm. |
